# Supplementary material
Source: PubMed Central journal article supplement (PMC7377371)
Supplement: ao0c02338_si_001.pdf [file ao0c02338_si_001.pdf]

## SUPPORTING INFORMATION.

### Development of a Stability-Indicating Analytical Method for Determination of Venetoclax Using AQB D Principles

Nina Žigart <sup>a,b</sup> and Zdenko Časar <sup>a,b,\*</sup>

<sup>a</sup> Lek Pharmaceuticals d.d., Sandoz Development Center Slovenia, Analytics Department, SI- 1526 Ljubljana, Slovenia

<sup>b</sup> University of Ljubljana, Faculty of Pharmacy, Chair of Medicinal Chemistry, Aškerčeva cesta 7, SI-1000, Ljubljana, Slovenia

\* Corresponding author: [zdenko.casar@sandoz.com](mailto:zdenko.casar@sandoz.com), [zdenko.casar@ffa.uni-lj.si](mailto:zdenko.casar@ffa.uni-lj.si)

## List of supporting information:

| Page   | Content                                                                                                                                                                                                                     |
|--------|-----------------------------------------------------------------------------------------------------------------------------------------------------------------------------------------------------------------------------|
| S3     | <b>Table S1.</b> Solvent testing                                                                                                                                                                                            |
| S4     | <b>Figure S1.</b> Predicted pH curves of venetoclax made by MarvinSketch                                                                                                                                                    |
| S5     | <b>Figure S2.</b> Chromatograms of venetoclax sample degraded with 1 M HCl at 50 °C for 3 days, using a BEH C18 column (top) and BEH Phenyl column (bottom).                                                                |
| S5     | <b>Figure S3.</b> Chromatograms of venetoclax sample degraded with 1 M HCl at 50 °C for 3 days – the influence of small pH changes can be seen (top and middle) as well as the omission of MTBE in mobile phase B (bottom). |
| S6     | <b>Figure S4.</b> The effects of column temperature change.                                                                                                                                                                 |
| S7     | <b>Figure S5.</b> Testing of different C18 chromatographic columns: Luna Omega C18, Kinetex C18, and CSH C18 column.                                                                                                        |
| S7     | <b>Table S2.</b> DoE from method scouting experiment                                                                                                                                                                        |
| S8     | <b>Table S3.</b> First DoE from method screening                                                                                                                                                                            |
| S9     | <b>Table S4.</b> Second DoE from method screening.                                                                                                                                                                          |
| S9-S10 | <b>Table S5.</b> DoE from method optimization.                                                                                                                                                                              |

**Table S1. Solvent testing <sup>a</sup>**

| Solvent composition             | Mass (m) of venetoclax [mg] | Visual evaluation           | HPLC analysis          |        | Visual evaluation of vials in autosampler at 5 °C after 3 days | Visual evaluation of vials in autosampler at 5 °C after 2 months |
|---------------------------------|-----------------------------|-----------------------------|------------------------|--------|----------------------------------------------------------------|------------------------------------------------------------------|
|                                 |                             |                             | Area under curve (AUC) | AUC/m  |                                                                |                                                                  |
| ACN-DMSO-buffer (7:2:1, v/v/v)  | 4.937                       | Clear solution              | 175,195                | 35,607 | Clear solution                                                 | Bigger crystals have precipitated                                |
| ACN-DMSO-buffer (6:3:1, v/v/v)  | 5.033                       | Clear solution              | 175,966                | 34,962 | Clear solution                                                 | Clear solution                                                   |
| ACN-DMSO-buffer (5:4:1, v/v/v)  | 4.861                       | Clear solution              | 169,722                | 34,915 | Clear solution                                                 | Clear solution                                                   |
| ACN-DMSO-buffer (4:5:1, v/v/v)  | 4.856                       | Clear solution              | 170,514                | 35,114 | Clear solution                                                 | Clear solution                                                   |
| ACN-buffer (8:2, v/v)           | 5.291                       | Cloudy, partially dissolved | 148,618                | 28,089 | Clear solution                                                 | Bigger crystals have precipitated                                |
| MeOH-buffer (8:2, v/v)          | 5.321                       | Cloudy, partially dissolved | 7,738                  | 1,454  | Clear solution                                                 | Clear solution                                                   |
| MeOH-DMSO-buffer (7:2:1, v/v/v) | 5.512                       | Cloudy, partially dissolved | 98,241                 | 17,823 | Clear solution                                                 | Smaller crystals have precipitated                               |
| MeOH-DMSO-buffer (4:5:1, v/v/v) | 7.583                       | Clear solution              | 213,965                | 28,216 | Clear solution                                                 | Smaller crystals have precipitated                               |

<sup>a</sup> About 5 mg of venetoclax was weighed into a flask and 5 mL of solvent was added. Flasks were then put in an ultrasound bath for 5 min, left at room temperature for 2 h, visually evaluated and then filtered through 0.22 µm polyvinylidene fluoride (PVDF) filters into HPLC vials for analysis.

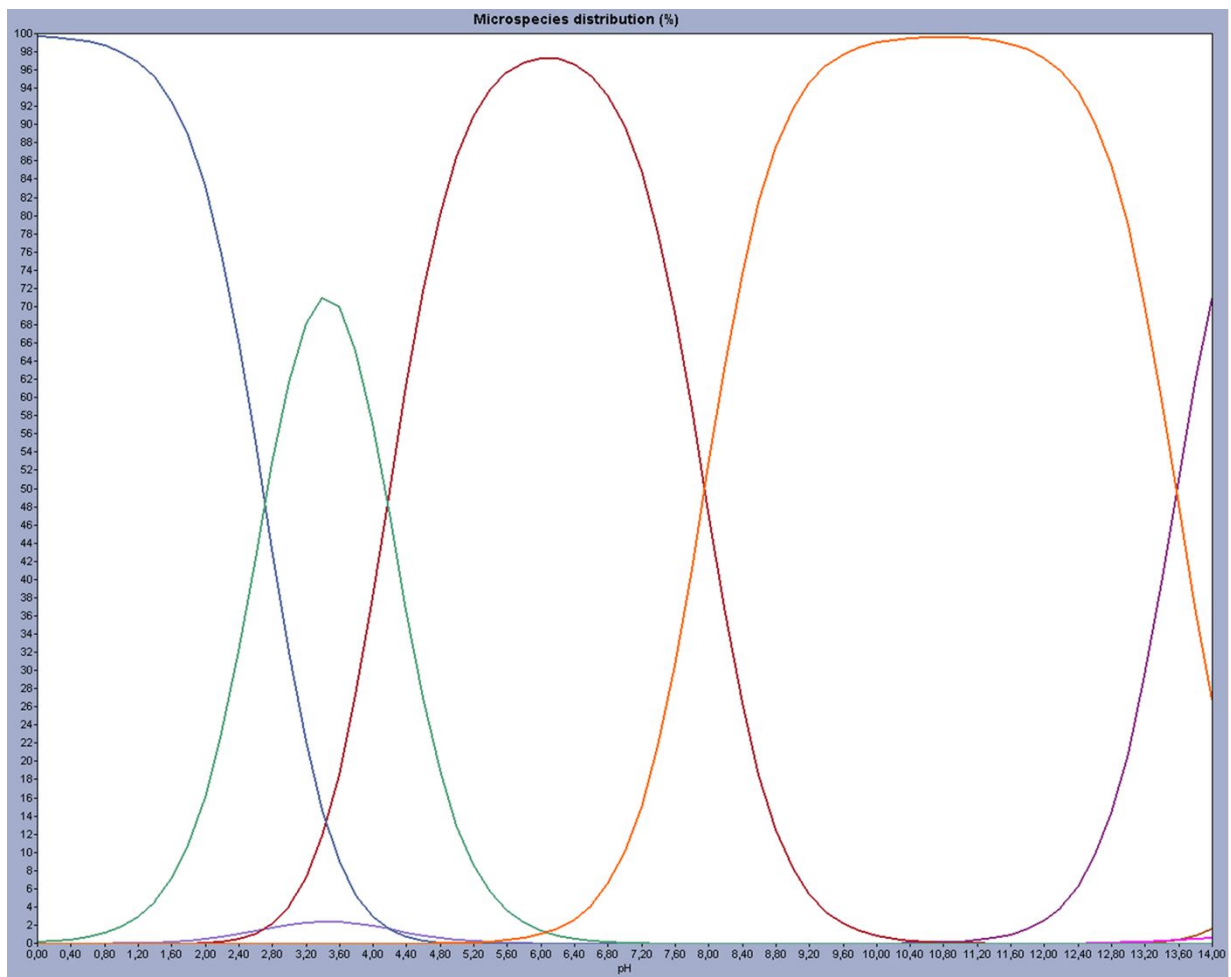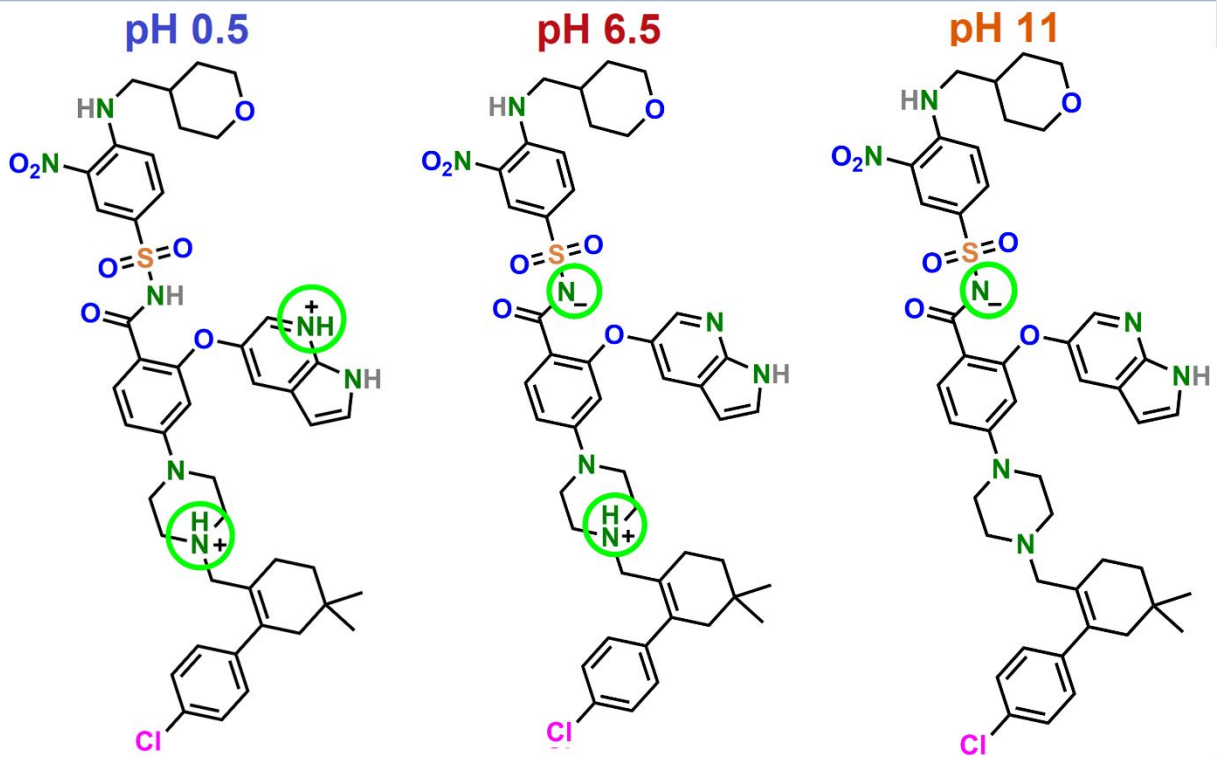

**Figure S1.** Predicted pH curves of venetoclax made by MarvinSketch. The three most prevalent microspecies are presented under the graph. Ionized parts of the molecule are marked with a green circle.

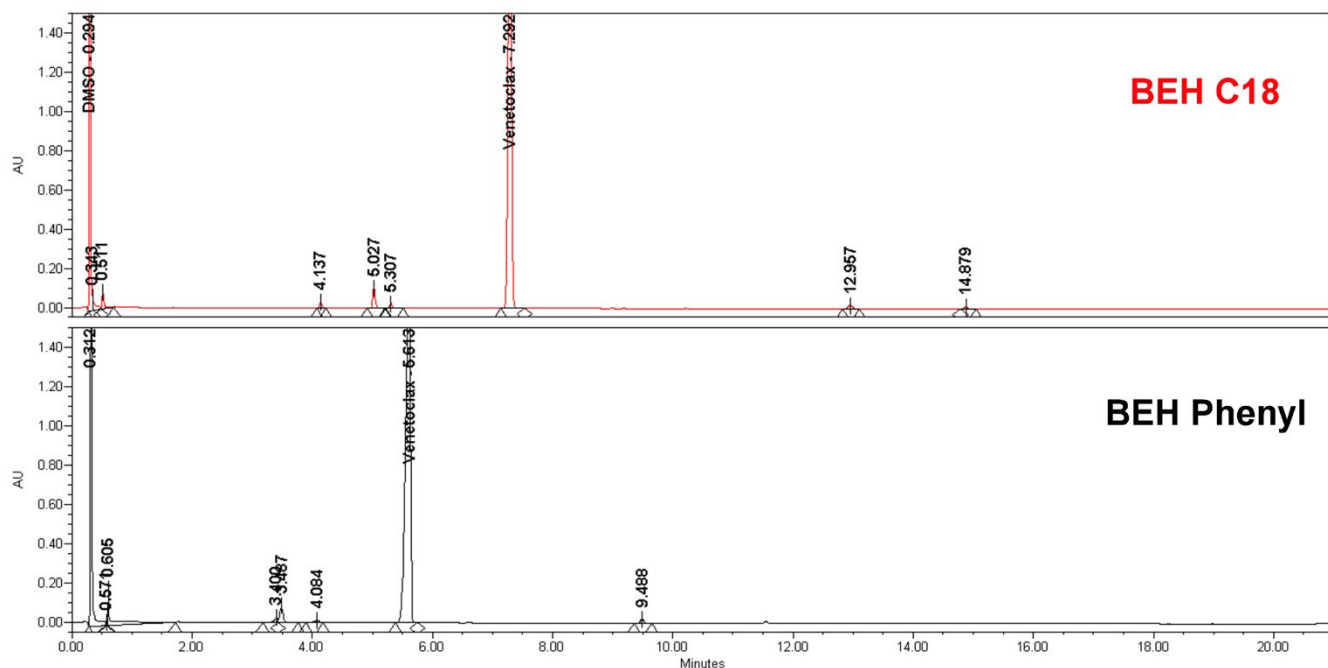

**Figure S2.** Chromatograms of venetoclax sample degraded with 1 M HCl at 50 °C for 3 days, using a BEH C18 column (top) and BEH Phenyl column (bottom) of the same particle size (1.7  $\mu\text{m}$ ), column length and width (100 mm  $\times$  2.1 mm), and chromatographic conditions (mobile phase A: A =  $\text{NH}_4\text{HCO}_3$  (pH 7.0 adjusted with acetic acid, 10 mM); mobile phase B: B = ACN-MTBE (85:0:80, v/v); column temperature 70 °C; autosampler temperature 5 °C; flow rate 0.75 mL/min, gradient: t = 0 min, 30% B; t = 1 min, 40% B; t = 15 min, 70% B; t = 20 min, 70% B; t = 21 min, 30% B).

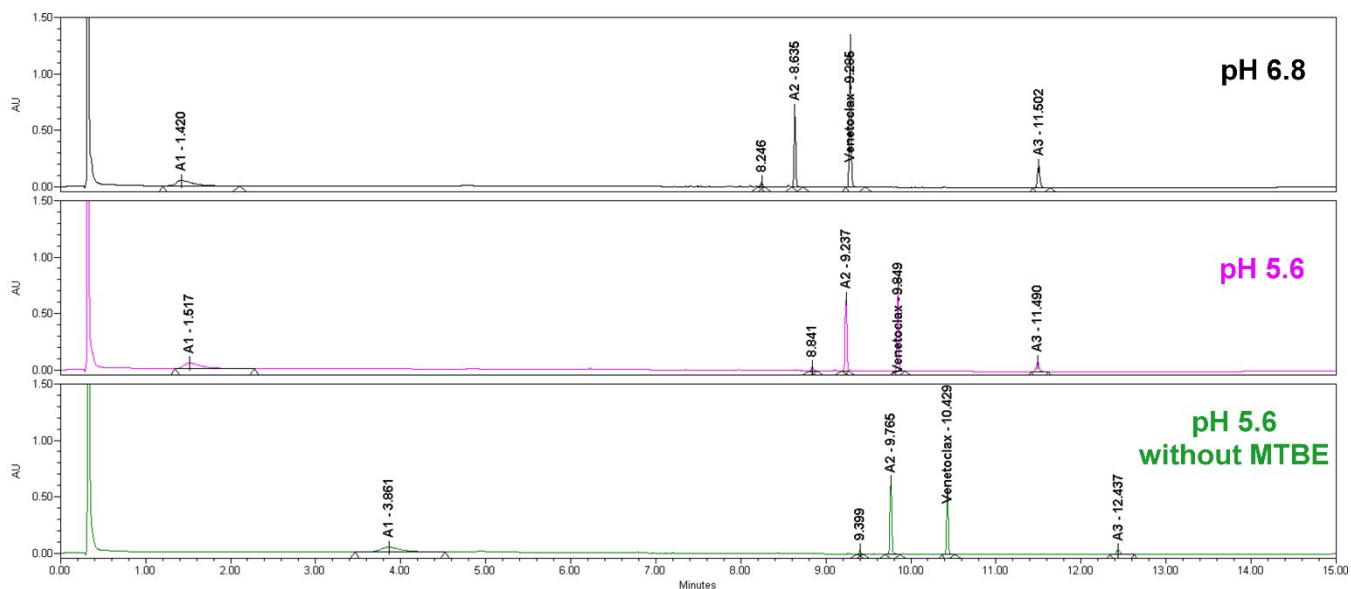

**Figure S3.** Chromatograms of venetoclax sample degraded with 1 M HCl at 50 °C for 3 days – the influence of small pH changes can be seen (top and middle) as well as the omission of MTBE in mobile phase B (bottom). Chromatographic conditions were: UPLC BEH C18 (1.7  $\mu\text{m}$ , 100 mm  $\times$  2.1 mm) column; mobile phase A: A =  $\text{NH}_4\text{HCO}_3$  (pH adjusted with acetic acid, 10 mM)-ACN (9:1, v/v); mobile phase B: B = ACN-MTBE (85:0:80, v/v) (top and middle) or 100% ACN (bottom); column temperature 70 °C; autosampler temperature 5 °C; flow rate 0.75 mL/min, gradient: t = 0 min, 0% B; t = 3 min, 0% B; t = 6 min, 30% B; t = 10 min, 70% B; t = 13 min, 70% B; t = 15 min, 30% B. The peak eluting at approximately 0.3 min is a solvent peak of DMSO.

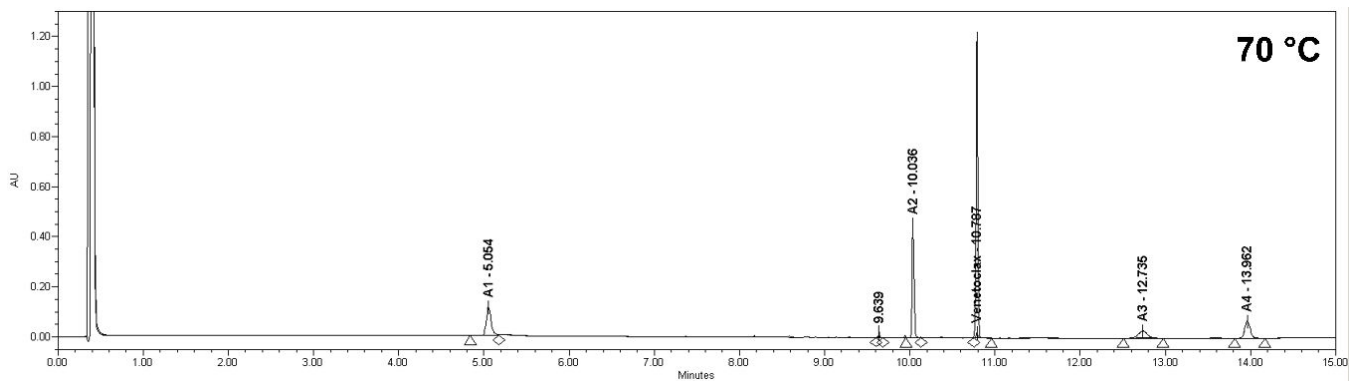

(a)

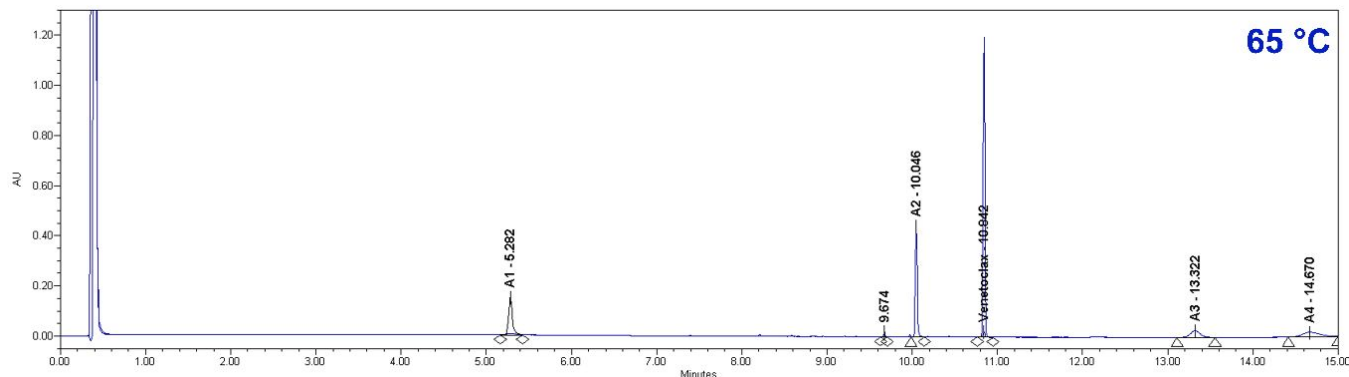

(b)

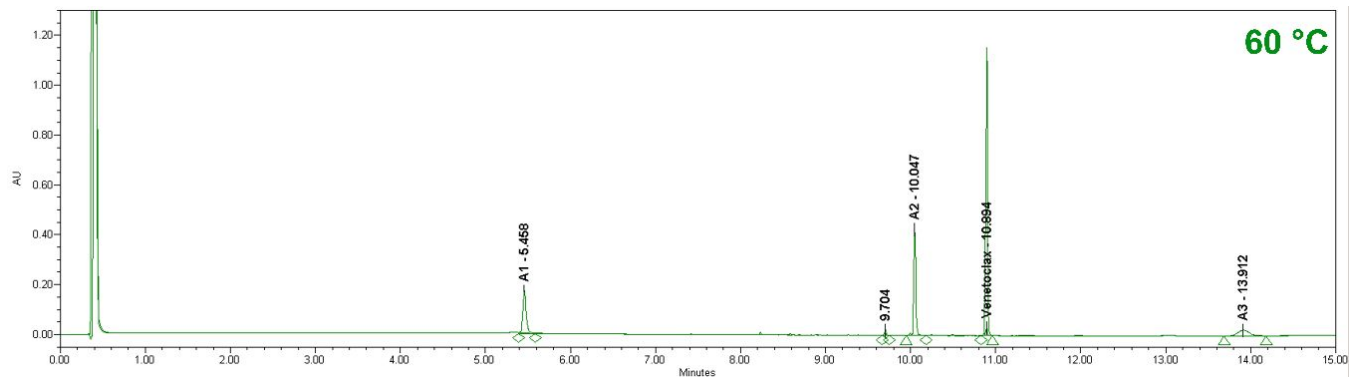

(c)

**Figure S4.** The effects of column temperature change. Presented are chromatogram overlays of venetoclax drug substance sample and venetoclax sample degraded with 1 M HCl at 50 °C for 6 days. The chromatograms are presented as overlays due to the significant decrease of the venetoclax concentration in the degraded sample. (a) Column temperature was 70 °C. (b) Column temperature was 65 °C. (c) Column temperature was 60 °C. Other chromatographic conditions were: UPLC CSH C18 (1.7  $\mu$ m, 100 mm  $\times$  2.1 mm) column; mobile phase A: A =  $\text{NH}_4\text{HCO}_3$  (pH 6.0, 10 mM)-ACN (9:1, v/v); mobile phase B: B = ACN; pump flow 0.6 mL/min; autosampler temperature 5 °C; gradient: t = 0 min, 0% B; t = 3 min, 0% B; t = 10 min, 70% B; t = 13 min, 70% B; t = 15 min, 30% B. The peak eluting at approximately 0.4 min is a solvent peak of DMSO.

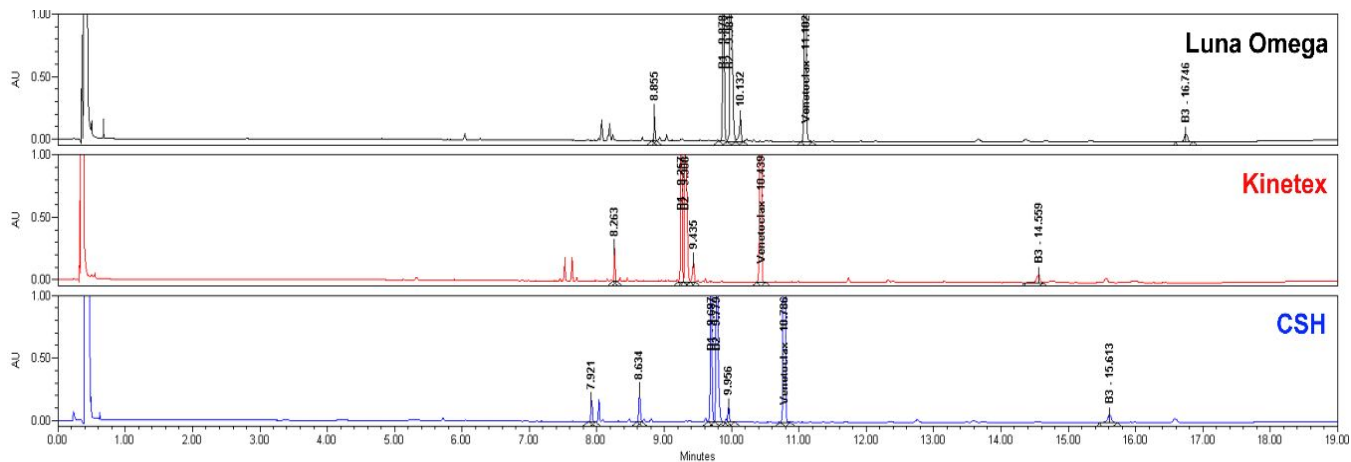

**Figure S5.** Testing of different C18 chromatographic columns: Luna Omega C18 (top), Kinetex C18 (middle), and CSH C18 (bottom) column. Presented are chromatograms of venetoclax sample degraded with 1 M NaOH at 50 °C for 14 days. Other chromatographic conditions were: mobile phase A: A =  $\text{NH}_4\text{HCO}_3$  (pH 6.0, 10 mM)-ACN (9:1, v/v); mobile phase B: B = ACN; pump flow 0.6 mL/min; column temperature 60 °C; autosampler temperature 5 °C; gradient: t = 0 min, 0% B; t = 3 min, 0% B; t = 10 min, 70% B; t = 12 min, 70% B; t = 16 min, 80% B; t = 18 min, 80% B; t = 19 min, 0% B. The peak eluting at approximately 0.4 min is a solvent peak of DMSO.

**Table S2.** DoE from method scouting experiment.

| Run No.              | Strong Solvent Type (*) | Gradient Time (min) | Column Type (*) |
|----------------------|-------------------------|---------------------|-----------------|
| Condition Column - 1 | Acetonitrile            | 10,0                | Column 1        |
| Condition Column - 2 | Acetonitrile            | 10,0                | Column 2        |
| 1                    | Acetonitrile            | 15,0                | Column 1        |
| 2                    | Acetonitrile            | 30,0                | Column 1        |
| 3                    | Acetonitrile            | 15,0                | Column 2        |
| 4                    | Acetonitrile            | 30,0                | Column 2        |
| 5                    | Acetonitrile            | 22,5                | Column 1        |
| 6                    | Acetonitrile            | 22,5                | Column 2        |
| 7                    | Acetonitrile            | 22,5                | Column 1        |
| 8                    | Acetonitrile            | 22,5                | Column 2        |
| Condition Column - 3 | Methanol                | 10,0                | Column 1        |
| Condition Column - 4 | Methanol                | 10,0                | Column 2        |
| 9                    | Methanol                | 15,0                | Column 1        |
| 10                   | Methanol                | 30,0                | Column 1        |
| 11                   | Methanol                | 15,0                | Column 2        |
| 12                   | Methanol                | 30,0                | Column 2        |
| 13                   | Methanol                | 22,5                | Column 1        |
| 14                   | Methanol                | 22,5                | Column 2        |
| 15                   | Methanol                | 22,5                | Column 1        |
| 16                   | Methanol                | 22,5                | Column 2        |
| Condition Column - 5 | Methanol                | 10,0                | Column 1        |
| Condition Column - 6 | Methanol                | 10,0                | Column 2        |

**Table S3. First DoE from method screening.**

| Run No.              | Pump Flow Rate (mL/min) | Final % Organic (%) | pH (*) |
|----------------------|-------------------------|---------------------|--------|
| Condition Column - 1 | 0,300                   | 95,0                | 6,00   |
| 1                    | 0,300                   | 95,0                | 6,00   |
| 2                    | 0,300                   | 80,0                | 6,00   |
| 3                    | 0,300                   | 87,5                | 6,00   |
| 4                    | 0,400                   | 95,0                | 6,00   |
| 5                    | 0,400                   | 80,0                | 6,00   |
| 6                    | 0,400                   | 87,5                | 6,00   |
| Condition Column - 2 | 0,300                   | 91,3                | 6,50   |
| 7                    | 0,300                   | 91,3                | 6,50   |
| 8                    | 0,300                   | 83,8                | 6,50   |
| 9                    | 0,400                   | 91,3                | 6,50   |
| 10                   | 0,400                   | 83,8                | 6,50   |
| Condition Column - 3 | 0,300                   | 87,5                | 7,00   |
| 11                   | 0,300                   | 87,5                | 7,00   |
| 12                   | 0,300                   | 95,0                | 7,00   |
| 13                   | 0,300                   | 80,0                | 7,00   |
| 14                   | 0,400                   | 95,0                | 7,00   |
| 15                   | 0,400                   | 80,0                | 7,00   |
| 16                   | 0,400                   | 87,5                | 7,00   |
| 17                   | 0,300                   | 87,5                | 7,00   |
| Condition Column - 4 | 0,300                   | 91,3                | 7,50   |
| 18                   | 0,300                   | 91,3                | 7,50   |
| 19                   | 0,400                   | 83,8                | 7,50   |
| Condition Column - 5 | 0,300                   | 95,0                | 8,00   |
| 20                   | 0,300                   | 95,0                | 8,00   |
| 21                   | 0,300                   | 80,0                | 8,00   |
| 22                   | 0,300                   | 87,5                | 8,00   |
| 23                   | 0,400                   | 95,0                | 8,00   |
| 24                   | 0,400                   | 80,0                | 8,00   |
| 25                   | 0,400                   | 87,5                | 8,00   |
| 26                   | 0,300                   | 80,0                | 8,00   |
| 27                   | 0,400                   | 95,0                | 8,00   |
| Condition Column - 6 | 0,300                   | 95,0                | 8,00   |



**Table S4. Second DoE from method screening.**

| Run No.              | Gradient Time (min) | Oven Temperature (°C) |
|----------------------|---------------------|-----------------------|
| Condition Column - 1 | 2,0                 | 40,0                  |
| 1                    | 18,0                | 40,0                  |
| 2                    | 6,0                 | 40,0                  |
| 3                    | 12,0                | 40,0                  |
| 4                    | 12,0                | 45,0                  |
| 5                    | 15,0                | 45,0                  |
| 6                    | 9,0                 | 45,0                  |
| 7                    | 18,0                | 45,0                  |
| 8                    | 12,0                | 45,0                  |
| 9                    | 15,0                | 50,0                  |
| 10                   | 9,0                 | 50,0                  |
| 11                   | 18,0                | 55,0                  |
| 12                   | 6,0                 | 55,0                  |
| 13                   | 12,0                | 55,0                  |
| 14                   | 18,0                | 55,0                  |
| 15                   | 6,0                 | 55,0                  |
| Condition Column - 2 | 2,0                 | 55,0                  |

**Table S5. DoE from method optimization.**

| Run No.              | Pump Flow Rate (mL/min) | Final % Organic (%) | Oven Temperature (°C) | pH (*) |
|----------------------|-------------------------|---------------------|-----------------------|--------|
| Condition Column - 1 | 0,400                   | 85,0                | 45,0                  | 6,00   |
| 1                    | 0,450                   | 85,0                | 45,0                  | 6,00   |
| 2                    | 0,450                   | 75,0                | 45,0                  | 6,00   |
| 3                    | 0,350                   | 75,0                | 45,0                  | 6,00   |
| 4                    | 0,400                   | 85,0                | 45,0                  | 6,00   |
| 5                    | 0,350                   | 80,0                | 45,0                  | 6,00   |
| 6                    | 0,450                   | 75,0                | 45,0                  | 6,00   |
| Condition Column - 2 | 0,400                   | 85,0                | 45,0                  | 7,00   |
| 7                    | 0,450                   | 85,0                | 45,0                  | 7,00   |
| 8                    | 0,350                   | 85,0                | 45,0                  | 7,00   |
| 9                    | 0,450                   | 75,0                | 45,0                  | 7,00   |
| 10                   | 0,400                   | 75,0                | 45,0                  | 7,00   |
| 11                   | 0,400                   | 80,0                | 45,0                  | 7,00   |
| Condition Column - 3 | 0,400                   | 85,0                | 45,0                  | 8,00   |
| 12                   | 0,350                   | 85,0                | 45,0                  | 8,00   |
| 13                   | 0,450                   | 75,0                | 45,0                  | 8,00   |
| 14                   | 0,350                   | 75,0                | 45,0                  | 8,00   |
| 15                   | 0,400                   | 85,0                | 45,0                  | 8,00   |
| 16                   | 0,450                   | 80,0                | 45,0                  | 8,00   |
| 17                   | 0,350                   | 75,0                | 45,0                  | 8,00   |
| Condition Column - 4 | 0,400                   | 82,5                | 48,8                  | 6,50   |
| 18                   | 0,375                   | 82,5                | 48,8                  | 6,50   |
| 19                   | 0,425                   | 77,5                | 48,8                  | 6,50   |
| Condition Column - 5 | 0,400                   | 85,0                | 52,5                  | 6,00   |
| 20                   | 0,450                   | 85,0                | 52,5                  | 6,00   |
| 21                   | 0,350                   | 85,0                | 52,5                  | 6,00   |
| 22                   | 0,400                   | 75,0                | 52,5                  | 6,00   |
| Condition Column - 6 | 0,400                   | 80,0                | 52,5                  | 7,00   |
| 23                   | 0,400                   | 80,0                | 52,5                  | 7,00   |

|                       |       |      |      |      |
|-----------------------|-------|------|------|------|
| 24                    | 0,450 | 75,0 | 52,5 | 7,00 |
| 25                    | 0,350 | 75,0 | 52,5 | 7,00 |
| 26                    | 0,350 | 80,0 | 52,5 | 7,00 |
| 27                    | 0,400 | 80,0 | 52,5 | 7,00 |
| Condition Column - 7  | 0,400 | 85,0 | 52,5 | 8,00 |
| 28                    | 0,450 | 85,0 | 52,5 | 8,00 |
| 29                    | 0,350 | 85,0 | 52,5 | 8,00 |
| 30                    | 0,400 | 75,0 | 52,5 | 8,00 |
| 31                    | 0,400 | 80,0 | 52,5 | 8,00 |
| Condition Column - 8  | 0,400 | 77,5 | 56,3 | 6,50 |
| 32                    | 0,375 | 77,5 | 56,3 | 6,50 |
| Condition Column - 9  | 0,400 | 82,5 | 56,3 | 7,50 |
| 33                    | 0,425 | 82,5 | 56,3 | 7,50 |
| Condition Column - 10 | 0,400 | 85,0 | 60,0 | 6,00 |
| 34                    | 0,450 | 85,0 | 60,0 | 6,00 |
| 35                    | 0,350 | 85,0 | 60,0 | 6,00 |
| 36                    | 0,450 | 75,0 | 60,0 | 6,00 |
| 37                    | 0,350 | 75,0 | 60,0 | 6,00 |
| 38                    | 0,400 | 85,0 | 60,0 | 6,00 |
| 39                    | 0,450 | 80,0 | 60,0 | 6,00 |
| Condition Column - 11 | 0,400 | 85,0 | 60,0 | 7,00 |
| 40                    | 0,450 | 85,0 | 60,0 | 7,00 |
| 41                    | 0,350 | 85,0 | 60,0 | 7,00 |
| 42                    | 0,350 | 75,0 | 60,0 | 7,00 |
| 43                    | 0,400 | 75,0 | 60,0 | 7,00 |
| Condition Column - 12 | 0,400 | 85,0 | 60,0 | 8,00 |
| 44                    | 0,450 | 85,0 | 60,0 | 8,00 |
| 45                    | 0,450 | 75,0 | 60,0 | 8,00 |
| 46                    | 0,350 | 75,0 | 60,0 | 8,00 |
| 47                    | 0,400 | 85,0 | 60,0 | 8,00 |
| 48                    | 0,350 | 80,0 | 60,0 | 8,00 |
| 49                    | 0,450 | 75,0 | 60,0 | 8,00 |
| Condition Column - 13 | 0,400 | 75,0 | 60,0 | 8,00 |
